# Supplementary material for: Implication of ERBB2 as a Predictive Tool for Survival in Patients with Pancreatic Cancer in Histological Studies
Source: MDPI journal article supplement (doi:10.3390/curroncol29040198), 2022-03-30
Supplement: s1 [file s1]

Supplementary Materials

**Table S1.** Clinical and labeling data of each protein.

| nº | ESTADIO | EDAD | SEXO<br>(1 h, 2 m) | TUMORES<br>(mama,<br>ovario, melan,<br>colon) | Ca 19.9<br>U/mL<br>(0-37) | CEA ng/mL<br>(0-5) | AFP<br>ng/mL<br>(0-13.4) | CDK4 | Cyclin d1 | β-Catenin | EGFR | ErbB2 | SUPERVIVENCIA<br>EN MESES |
|----|---------|------|--------------------|-----------------------------------------------|---------------------------|--------------------|--------------------------|------|-----------|-----------|------|-------|---------------------------|
| 1  | <IV     | 67   | 1                  | 1                                             | 42.36                     | 27                 | 7                        | 2    | 1         | 2         | 2    | 2     | 7                         |
| 2  | IV      | 82   | 1                  | 1                                             | 44.91                     | 34                 | 6.01                     | 2    | 2         | 1         | 2    | 2     | 8                         |
| 3  | IV      | 61   | 2                  | 0                                             | 69.52                     | 2.2                | 3.8                      | 0    | 0         | 0         | 2    | 1     | 14                        |
| 4  | <IV     | 62   | 2                  | 0                                             | 102                       | 2.6                | 1.31                     | 1    | 0         | 0         | 2    | 2     | 13                        |
| 5  | <IV     | 70   | 1                  | 0                                             | 189.6                     | 5.74               | 1.73                     | 2    | 0         | 0         | 2    | 2     | 11                        |
| 6  | <IV     | 45   | 1                  | 0                                             | 1079                      | 22.68              | 2.4                      | 2    | 2         | 1         | 2    | 1     | 6                         |
| 7  | IV      | 63   | 1                  | 0                                             | 178                       | 13.84              | 4.39                     | 2    | 2         | 1         | 2    | 2     | 7                         |
| 8  | <IV     | 77   | 1                  | 0                                             | 86                        | 3.79               | 1.93                     | 0    | 1         | 0         | 1    | 2     | 28                        |
| 9  | IV      | 71   | 2                  | 0                                             | 2.62                      | 23.56              | 1.07                     | 2    | 1         | 2         | 2    | 1     | 8                         |
| 10 | <IV     | 57   | 2                  | 0                                             | 1.000                     | 5.62               | 5.77                     | 2    | 1         | 2         | 2    | 2     | 1                         |
| 11 | <IV     | 76   | 1                  | 1                                             | 635.4                     | 11.31              | 1.98                     | 1    | 2         | 1         | 2    | 2     | 11                        |
| 12 | <IV     | 77   | 1                  | 1                                             | 8.4                       | 2.23               | 1.12                     | 2    | 2         | 2         | 2    | 2     | 1                         |
| 13 | <IV     | 72   | 1                  | 0                                             | 1.08                      | 2.71               | 1.12                     | 0    | 1         | 1         | 0    | 1     | 13                        |
| 14 | <IV     | 73   | 2                  | 0                                             | 2.933                     | 3.26               | 16.13                    | 2    | 0         | 2         | 0    | 2     | 8                         |
| 15 | IV      | 66   | 1                  | 0                                             | 340.6                     | 4.9                | 3.39                     | 0    | 1         | 1         | 0    | 1     | 24                        |
| 16 | <IV     | 72   | 2                  | 1                                             | 102.1                     | 2.42               | 2.66                     | 2    | 1         | 1         | 2    | 2     | 5                         |
| 17 | <IV     | 83   | 1                  | 0                                             | 805                       | 17                 | 5.4                      | 1    | 1         | 1         | 2    | 2     | 4                         |
| 18 | <IV     | 73   | 2                  | 0                                             | 29.31                     | 1.54               | 7.62                     | 1    | 0         | 0         | 2    | 1     | 20                        |
| 19 | <IV     | 69   | 1                  | 1                                             | 3.47                      | 10.24              | 2.24                     | 0    | 0         | 0         | 1    | 0     | 60                        |

|    |     |    |   |   |        |       |       |   |   |   |   |   |    |
|----|-----|----|---|---|--------|-------|-------|---|---|---|---|---|----|
| 20 | <IV | 79 | 2 | 0 | 2324   | 12.6  | 5.46  | 1 | 1 | 1 | 1 | 1 | 11 |
| 21 | IV  | 72 | 1 | 0 | 721.6  | 1.8   | 1.09  | 1 | 1 | 0 | 1 | 1 | 13 |
| 22 | <IV | 88 | 1 | 1 | 0.6    | 1.82  | 1.24  | 2 | 1 | 1 | 1 | 2 | 9  |
| 23 | IV  | 64 | 2 | 0 | 45.25  | 3.89  | 4.33  | 1 | 1 | 0 | 1 | 1 | 16 |
| 24 | IV  | 57 | 1 | 1 | 47.42  | 8.6   | 6.48  | 1 | 1 | 0 | 1 | 1 | 16 |
| 25 | <IV | 61 | 2 | 0 | 203    | 4.19  | 2.1   | 2 | 2 | 1 | 2 | 2 | 4  |
| 26 | IV  | 74 | 1 | 0 | 8868   | 8.05  | 1.22  | 1 | 2 | 1 | 2 | 2 | 4  |
| 27 | <IV | 70 | 1 | 0 | 56.01  | 5.43  | 0.98  | 1 | 1 | 0 | 1 | 1 | 33 |
| 28 | IV  | 74 | 2 | 0 | 10.000 | 57.5  | 30.79 | 2 | 1 | 1 | 1 | 2 | 6  |
| 29 | <IV | 67 | 1 | 0 | 160.9  | 7.92  | 1.72  | 1 | 0 | 0 | 0 | 1 | 30 |
| 30 | <IV | 67 | 2 | 0 | 87.67  | 7.84  | 1.56  | 1 | 0 | 0 | 1 | 0 | 39 |
| 31 | <IV | 74 | 1 | 0 | 152.6  | 1.98  | 0.61  | 2 | 1 | 1 | 1 | 1 | 16 |
| 32 | <IV | 75 | 1 | 0 | 59.16  | 1.56  | 2.66  | 0 | 1 | 0 | 2 | 0 | 22 |
| 33 | <IV | 69 | 1 | 0 | 4.64   | 4.24  | 2.32  | 1 | 1 | 0 | 1 | 1 | 16 |
| 34 | <IV | 83 | 1 | 0 | 10.000 | 498   | 2.87  | 2 | 2 | 1 | 2 | 2 | 2  |
| 35 | <IV | 85 | 1 | 1 | 114.8  | 1.78  | 1.86  | 2 | 2 | 1 | 2 | 2 | 7  |
| 36 | IV  | 82 | 1 | 0 | 1.000  | 40.46 | 1.39  | 1 | 2 | 2 | 2 | 2 | 5  |
| 37 | <IV | 73 | 1 | 0 | 31.03  | 2.77  | 1.51  | 2 | 2 | 2 | 1 | 2 | 7  |
| 38 | <IV | 67 | 2 | 0 | 48.32  | 7.85  | 7.25  | 1 | 1 | 0 | 0 | 1 | 17 |
| 39 | IV  | 76 | 1 | 1 | 2145   | 6.52  | 2.56  | 2 | 2 | 1 | 1 | 2 | 6  |
| 40 | IV  | 77 | 2 | 0 | 1774   | 4.58  | 3     | 2 | 2 | 1 | 2 | 2 | 4  |
| 41 | <IV | 67 | 1 | 1 | 36.28  | 3.44  | 1.46  | 1 | 2 | 1 | 2 | 2 | 4  |

---
